# Supplementary material
Source: MDPI journal article supplement (https://www.mdpi.com/2073-445X/12/11/1965)
Supplement: s1 [file s1]

Supplementary material for

# Impacts of Urbanization and its Parameters on Thermal and Dynamic Fields in Hangzhou: a Sensitivity Study using the Weather Research and Forecasting-Urban Model

Mengwen Wu, Meiyong Dong, Feng Chen, and Xuchao Yang

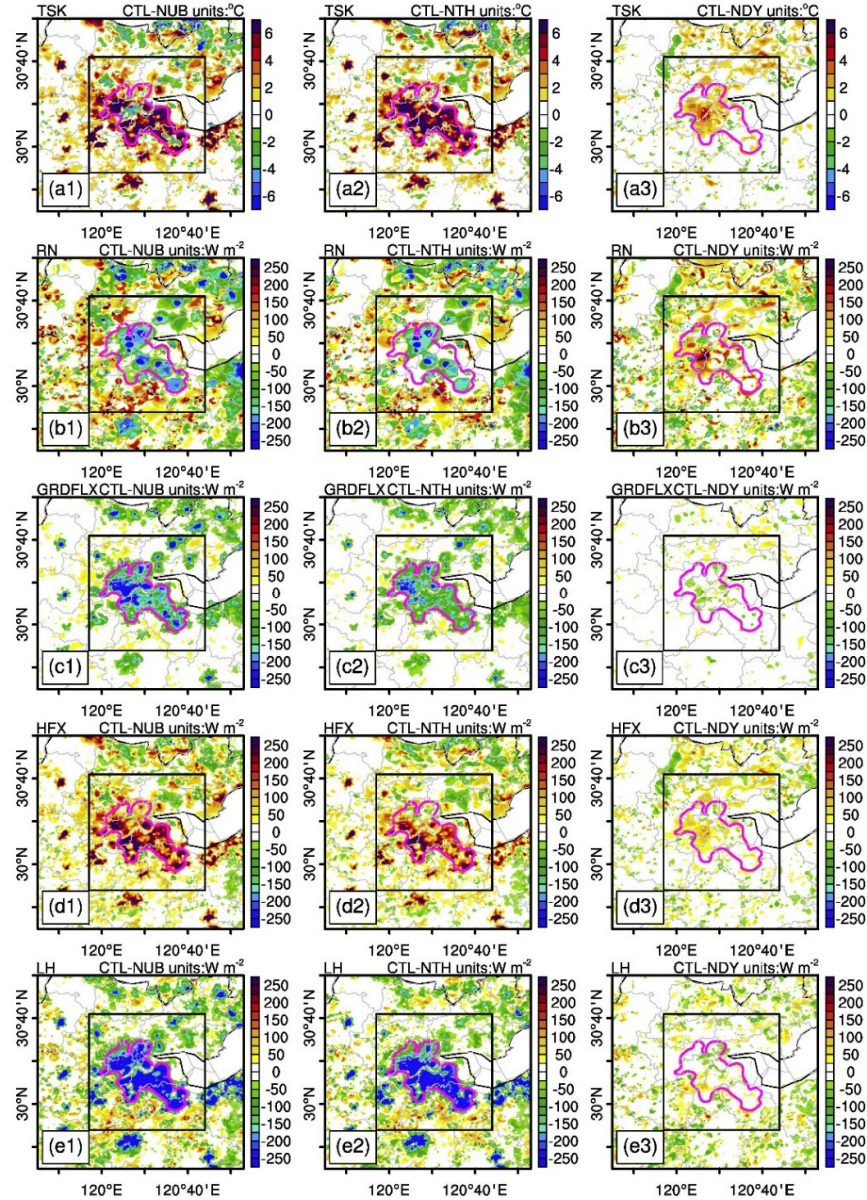

**Figure S1.** Differences in (a1-a3) surface skin temperature ( $^{\circ}\text{C}$ ), (b1-b3) surface net radiation ( $\text{W m}^{-1}$ ), (c1-c3) ground heat flux ( $\text{W m}^{-2}$ ), (d1-d3) sensible heat flux ( $\text{W m}^{-2}$ ), and (e1-e3) latent heat flux ( $\text{W m}^{-1}$ ) averaged during 10:00 to 13:00 BST on 26 July 2018 between the control test (CTL) and (left) NoUB, (middle) NoTH, and (right) NoDY test.

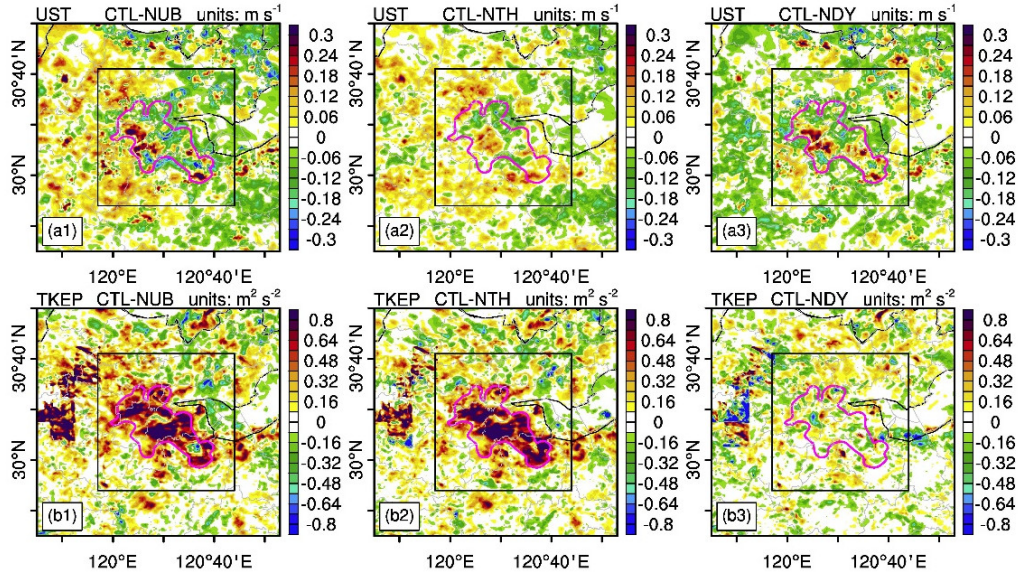

**Figure S2.** Same as Figure S1 but for (a1-a3) friction velocity UST ( $\text{m s}^{-1}$ ) and (b1-b3) turbulent kinetic energy TKEP ( $\text{m}^2 \text{s}^{-2}$ ) at 850h Pa during 10:00 to 18:00 BST on 26 July 2018.
